# Supplementary material
Source: HighWire-hosted journal article supplement (https://drc.bmj.com/content/suppl/2023/01/27/11.1.e003119)
Supplement: bmjdrc-2022-003119supp001_data_supplement.pdf [file bmjdrc-2022-003119supp001_data_supplement.pdf]

## Supplemental material

### Invasive validation of the Antares algorithm for determining central blood pressure based on upper arm oscillometric pulse waves in individuals with type 2 diabetes

BMJ Open Diabetes Research & Care

Alexander Stäuber<sup>1\*</sup>, Cornelia Piper<sup>2</sup>, Marco Köster<sup>2</sup>, Marcus Dörr<sup>3,4</sup>, Stefan Richter<sup>5,6</sup>, Marc-Alexander Ohlow<sup>7</sup>, Siegfried Eckert<sup>2</sup>, Johannes Baulmann<sup>8,9</sup>

1 Movement and Training Science, Leipzig University, Jahnallee 59, 04109 Leipzig, Germany, e-mail:

alexander.staeuber@uni-leipzig.de

2 Klinik für Allgemeine und Interventionelle Kardiologie/Angiologie, Universitätsklinik der Ruhr-

Universität Bochum, Georgstraße 11, D-32545 Bad Oeynhausen, Germany, e-mail: cpiper@hdz-nrw.de / mkoester@hdz-nrw.de / eckert.siegfried@web.de

3 Department of Internal Medicine B, University Medicine Greifswald, Ferdinand-Sauerbruch-Straße,

D-17475 Greifswald, Germany / e-mail: marcus.doerr@uni-greifswald.de

4 German Centre for Cardiovascular Research (DZHK), Partner Site Greifswald, Greifswald,

Germany, e-mail: marcus.doerr@uni-greifswald.de

5 Department of Cardiology, Zentralklinik Bad Berka GmbH, Herzzentrum, Robert-Koch-Allee 9, D-

99437 Bad Berka, Germany, e-mail: stefan.richter@zentralklinik.de

6 Department of Cardiology, SRH Klinikum Burgenlandkreis GmbH, Humboldtstraße 31, D-06618

Naumburg, Germany, e-mail: stefan.richter@klinikum-burgenlandkreis.de

7 Department of Cardiology, SRH Wald-Klinikum GmbH, Strasse des Friedens 122, D-07548 Gera,

Germany, e-mail: marc-alexander.ohlow@srh.de

8 Praxis Dres. Gille/Baulmann, Keramikerstr. 61, D-53359 Rheinbach, Germany, e-mail:

jbaulmann@yahoo.com

9 Division of Cardiology, Medical University of Graz, Auenbruggerplatz 15, A-8036 Graz, Austria,

e-mail: jbaulmann@yahoo.com

**\*Corresponding author:** Alexander Stäuber | alexander.staeuber@uni-leipzig.de

**Table S1.** Summary of validation protocol components and requirements of the 2017 ARTERY Society Task Force consensus statement and ANSI/AAMI/ISO 81060-2:2019.

| Protocol section                                                         | Protocol item ARTERY 2017                                                                                                           | Protocol requirement ARTERY 2017                                                | Protocol item ANSI/AAMI/ISO 81060-2:2019 and requirement | Protocol item undertaken (Yes / No / Comment)       |
|--------------------------------------------------------------------------|-------------------------------------------------------------------------------------------------------------------------------------|---------------------------------------------------------------------------------|----------------------------------------------------------|-----------------------------------------------------|
| <b>Study setting</b>                                                     | Isolated room without disturbing influences                                                                                         | Should                                                                          | Not specified                                            | Yes                                                 |
| <b>Non-invasive (central) BP device measurement standards</b>            | List manufacturer, model, software version, operating principles, signal processing step/s, calibration process                     | Must                                                                            | Not specified                                            | Yes                                                 |
|                                                                          | Time for BP measures; time points of brachial BP and central BP; cuff deflation speed                                               | Should                                                                          | Must                                                     | Yes, full description published in Dörr et al. [19] |
|                                                                          | Define and use appropriate cuff size                                                                                                | Must                                                                            | Must                                                     | Yes, full description published in Dörr et al. [19] |
|                                                                          | Dimensions of inflatable bladder for all cuff sizes available; process to determine cuff size                                       | Should                                                                          | Must                                                     | Yes                                                 |
|                                                                          | Separate validation studies for additional or optional features or functions                                                        | Must                                                                            | Not specified                                            | Yes, here focus on central BP                       |
|                                                                          | Process/s of quality control; process used to delineate acceptable quality; number of unacceptable readings; reason/s for exclusion | Must                                                                            | Not specified                                            | Yes                                                 |
|                                                                          | <b>Invasive (intra-arterial) central BP reference standard</b>                                                                      | Micromanometer-tipped catheter used if minor inflection points to be identified | Should                                                   | Not specified                                       |
| Full description of catheter; frequency response and handling procedures |                                                                                                                                     | Must                                                                            | Not specified                                            | Yes, full description published in Dörr et al. [19] |

Table S1. (continued)

| Protocol section                           | Protocol item<br>ARTERY 2017                                                                                                    | Protocol<br>requirement<br>ARTERY<br>2017 | Protocol item<br>ANSI/AAMI/ISO<br>81060-2:2019<br>and requirement                                                               | Protocol item<br>undertaken<br>(Yes / No /<br>Comment)                                       |
|--------------------------------------------|---------------------------------------------------------------------------------------------------------------------------------|-------------------------------------------|---------------------------------------------------------------------------------------------------------------------------------|----------------------------------------------------------------------------------------------|
|                                            | Performance comparison of fluid-filled catheter with micromanometer-tipped catheter                                             | May                                       | Not specified                                                                                                                   | No                                                                                           |
| <b>Data acquisition at rest</b>            | Period of undisturbed rest; medications used                                                                                    | Should                                    | Not specified                                                                                                                   | Yes                                                                                          |
|                                            | No talking. Free from acute hemodynamic interventions                                                                           | Must                                      | Not specified                                                                                                                   | Yes                                                                                          |
|                                            | Test device compared with reference over time-period matching the test device deflation cycle; recorded under stable conditions | Must                                      | Must                                                                                                                            | Yes                                                                                          |
|                                            | Complete description of protocol; time interval between test device and reference measures                                      | Must                                      | Not specified                                                                                                                   | Yes                                                                                          |
| <b>Data acquisition at BP intervention</b> | Hemodynamic change from resting state                                                                                           | May                                       | Must, in case of an intended use of automated non-invasive BP device in physical exercise testing                               | Not applicable because no intervention done                                                  |
|                                            | Description of the intervention procedure                                                                                       | Must                                      | Not specified                                                                                                                   |                                                                                              |
| <b>Sample characteristics</b>              | Sample size of at least 85 adults                                                                                               | Should                                    | Sample size of at least 15 patients with not more than 10 valid BP measurements per patient. At least 150 valid BP measurements | ARTERY 2017 requirements were fulfilled but ANSI/AAMI/ISO 81060-2:2019 requirements were not |
|                                            | Sex distribution of at least 30% male and female                                                                                | Should                                    | Must                                                                                                                            | No, study population consisted of 76% males and 24% females                                  |

Table S1. (continued)

| Protocol section                | Protocol item<br>ARTERY 2017                                                                                                                                                   | Protocol<br>requirement<br>ARTERY<br>2017 | Protocol item<br>ANSI/AAMI/ISO<br>81060-2:2019<br>and requirement                                            | Protocol item<br>undertaken<br>(Yes / No /<br>Comment)                                                                               |
|---------------------------------|--------------------------------------------------------------------------------------------------------------------------------------------------------------------------------|-------------------------------------------|--------------------------------------------------------------------------------------------------------------|--------------------------------------------------------------------------------------------------------------------------------------|
|                                 | Participants should have sinus rhythm unless the device is being tested for accuracy during arrhythmias                                                                        | Should                                    | Not specified                                                                                                | Yes                                                                                                                                  |
|                                 | Devices should be tested over a range of BP                                                                                                                                    | Should                                    | Must                                                                                                         | Yes, but not testable for all proposed indicative ranges, see Table S2                                                               |
|                                 | Device accuracy should be tested across a range of heart rates (i.e., 60-100/min)                                                                                              | Should                                    | Not specified                                                                                                | Yes                                                                                                                                  |
| <b>Statistical requirements</b> | Description of subjects                                                                                                                                                        | Must                                      | Not specified                                                                                                | Yes                                                                                                                                  |
|                                 | Comparison between non-invasive and reference BP's must report mean difference, SD of the mean difference, and limits of agreement, illustrated by modified Bland-Altman plots | Must                                      | Comparison between non-invasive and reference BP's must report mean difference and SD of the mean difference | Yes, mean difference between the estimated and invasively measured central BP was calculated according to ANSI/AAMI/ISO 81060-2:2019 |
|                                 | Scatter plots of the measures obtained with the non-invasive device (on Y axis) the reference method (on X axis), with the line of equality                                    | May                                       | Not specified                                                                                                | Yes                                                                                                                                  |
|                                 | Absolute BP differences from the reference should be presented as a clinical meaningful illustration of the results but without a pass/fail criteria                           | Should                                    | Not specified                                                                                                | No                                                                                                                                   |

*BP, blood pressure; SD, standard deviation*

**Table S2.** Invasive central (aortic) blood pressure (cBP) and data distribution of individuals with type 2 diabetes (n=119).

| <b>cBP Distribution</b> | <b>N (%)</b> |
|-------------------------|--------------|
| cSBP≤100 mmHg           | 8 (7)        |
| cSBP>100<140 mmHg       | 56 (47)      |
| cSBP≥140<160 mmHg       | 35 (29)      |
| cSBP≥160 mmHg           | 20 (17)      |
| cDBP≤60 mmHg            | 28 (24)      |
| cDBP>60<85 mmHg         | 86 (72)      |
| cDBP>85<100 mmHg        | 5 (4)        |
| cDBP≥100 mmHg           | 0 (0)        |

*cSBP, central systolic blood pressure; cDBP, central diastolic blood pressure*

**Table S3.** Beat-to-beat variations in invasive central (aortic) blood pressure (cBP) in individuals with type 2 diabetes (n=119) presented as standard deviation (SD).

| <b>SD of invasive cBP</b> |                     |
|---------------------------|---------------------|
| cSBP [mmHg]               | 4.5 ± 1.8 (1.3-9.6) |
| cDBP [mmHg]               | 2.4 ± 1.1 (0.3-5.7) |
| cMAP [mmHg]               | 3.1 ± 1.4 (0.8-7.8) |

*Values are presented as mean ± standard deviation (min-max); cSBP, central systolic blood pressure; cDBP, central diastolic blood pressure; cMAP, central mean arterial pressure*
